# Supplementary material for: United Kingdom Early Detection Initiative (UK-EDI): protocol for establishing a national multicentre cohort of individuals with new-onset diabetes for early detection of pancreatic cancer
Source: PubMed Central journal article supplement (PMC9557307; doi:10.1136/bmjopen-2022-068010), 2022-10-10
Supplement: bmjopen-2022-068010.reviewer_comments.pdf [file bmjopen-2022-068010.reviewer_comments.pdf]

## PEER REVIEW HISTORY

BMJ Open publishes all reviews undertaken for accepted manuscripts. Reviewers are asked to complete a checklist review form (<http://bmjopen.bmj.com/site/about/resources/checklist.pdf>) and are provided with free text boxes to elaborate on their assessment. These free text comments are reproduced below.

## ARTICLE DETAILS

|                            |                                                                                                                                                                                                                                                                                |
|----------------------------|--------------------------------------------------------------------------------------------------------------------------------------------------------------------------------------------------------------------------------------------------------------------------------|
| <b>TITLE (PROVISIONAL)</b> | The United Kingdom Early Detection Initiative (UK-EDI): Protocol for establishing a national multi-centre cohort of individuals with new-onset diabetes for early detection of pancreatic cancer                                                                               |
| <b>AUTHORS</b>             | Oldfield, Lucy; Stott, Martyn; Hanson, Robert; Jackson, Richard; Reynolds, William; Chandran-Gorner, Vatshala; Van Der Meer, Robert; Alison, Laurence; Tejeiro, Ricardo; Purewal, Tejpal; Ghaneh, Paula; Palmer, Daniel; Greenhalf, William; Halloran, Chris; Costello, Eithne |

This article was not externally reviewed at BMJ Open. Protocols that have been independently assessed prior to submission to BMJ Open are usually fast-tracked to publication on the grounds that further substantial changes will not be possible. This independent assessment will usually be external, independent review for both a substantial grant award from a non-commercial or government funder and ethics approval.
